# Supplementary material
Source: publisher site journal article supplement (https://static.cambridge.org/content/id/urn:cambridge.org:id:article:S1355617721000266/resource/name/S1355617721000266supp001.docx)
Supplement: Supplementary file 1 [file S1355617721000266supp001.docx]

**Supplementary Material**

**Power analysis** - The power of the study was calculated by G*Power software (Faul, Erdfelder, Lang, & Buchner, 2007) and estimated by using the effect size of a previous study in which the performance of two groups of adult participants was compared in the post-acquisition test of the PS task (*ηp²=.*213) (Frank, Santamaria, O'Reilly, & Willcutt, 2007). The power analysis indicated that in order to detect a difference between the two groups a sample of 17 participants per group would be needed to obtain statistical power at a .80 level with an alpha of .05.

**The influence of reinforcing feedback on rapid early acquisition**

According to Waltz, Frank, Robinson, and Gold (2007), performance on the post-acquisition test items in the PS task reflects the gradual, habit-like acquisition of contingencies, largely dependent on the BG. A second type of reinforcement learning involves the (PFC-dependent) ability to represent and integrate feedback online to rapidly learn contingencies (Frank & Claus, 2006). To assess the second type of learning, we calculated "win-stay "and "lose-shift" scores for each reinforcement condition in block 1. Win stay scores were defined as the proportion of repeated stimulus choices in a given condition that followed reinforced choices. Lose-shift scores were determined as the proportion of switched stimulus choices in a given condition that followed non-reinforced choices. Total win-stay and lose-shift scores were assessed by averaging scores across conditions for each group, and between-group differences in mean scores were examined using t tests. Two-sample *t*-tests revealed that following positive feedback, participants with dyslexia were as likely as neurotypicals to choose the same rewarded stimulus in the next trial where it appeared (i.e., win-stay condition), *t* (38) = 1.55, *p* = .12, and were also comparable in switching choices in the subsequent trial of the same type after receiving negative feedback (i.e., lose-shift condition), *t*(36) = -.90, *p* = .37.This pattern of results suggests that individuals with dyslexia are capable of using feedback to rapidly modify choice behavior.

Faul, F., Erdfelder, E., Lang, A.-G., & Buchner, A. (2007). G* Power 3: A flexible statistical power analysis program for the social, behavioral, and biomedical sciences. *Behavior research methods, 39*(2), 175-191.

Frank, M. J., & Claus, E. D. (2006). Anatomy of a decision: striato-orbitofrontal interactions in reinforcement learning, decision making, and reversal. *Psychological review, 113*(2), 300.

Frank, M. J., Santamaria, A., O'Reilly, R. C., & Willcutt, E. (2007). Testing computational models of dopamine and noradrenaline dysfunction in attention deficit/hyperactivity disorder. *Neuropsychopharmacology, 32*(7), 1583-1599.

Waltz, J. A., Frank, M. J., Robinson, B. M., & Gold, J. M. (2007). Selective reinforcement learning deficits in schizophrenia support predictions from computational models of striatal-cortical dysfunction. *Biological psychiatry, 62*(7), 756-764.
